# Supplementary material for: Universal strategy using environment-friendly inorganic compounds for the preparation of porous carbon nitride for efficient photocatalytic hydrogen production and environmental remediation
Source: Royal Society of Chemistry journal article supplement (doi:10.1039/d0nj03506h), 2021-01-01
Supplement: d0nj03506h1.pdf [file d0nj03506h1.pdf]

## Supporting Information

### **Universal and environment-friendly inorganic compounds strategy for preparation of porous carbon nitride for efficient photocatalytic hydrogen production and environmental remediation**

*Jianhai Wang<sup>a\*</sup>, Yuanjian Zhang<sup>b</sup>, Yuesong Shen<sup>a</sup>*

*<sup>a</sup> College of Materials Science and Engineering, Nanjing Tech University, Nanjing 211816, China.*

*<sup>b</sup> Jiangsu Engineering Laboratory of Smart Carbon-Rich Materials and Device, Jiangsu Province Hi-Tech Key Laboratory for Bio-Medical Research, School of Chemistry and Chemical Engineering, Medical School, Southeast University, Nanjing 211189, China.*

*Corresponding to: wangjianhai@njtech.edu.cn*

**Table S1** The full widths at half maxima (FWHMs) of XRD patterns of CN and CN-m-n (m/n=1:1, 1:2 and 1:4).

| Sample | FWHMs |
|--------|-------|
| CN     | 0.899 |
| CN-1-1 | 0.940 |
| CN-1-2 | 0.983 |
| CN-1-4 | 0.906 |



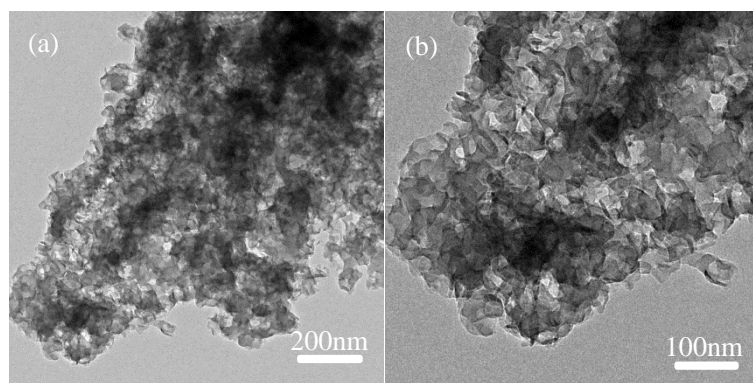

**Fig. S1** The TEM image of CN-1-2 (a) and (b).

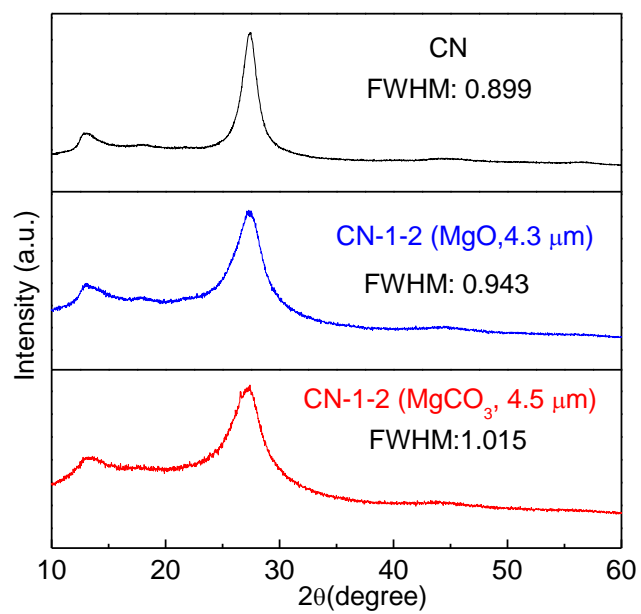

**Fig. S2** The XRD patterns of CN, CN-1-2 (MgO, 4.3μm) and CN-1-2 (MgCO<sub>3</sub>, 4.5μm).

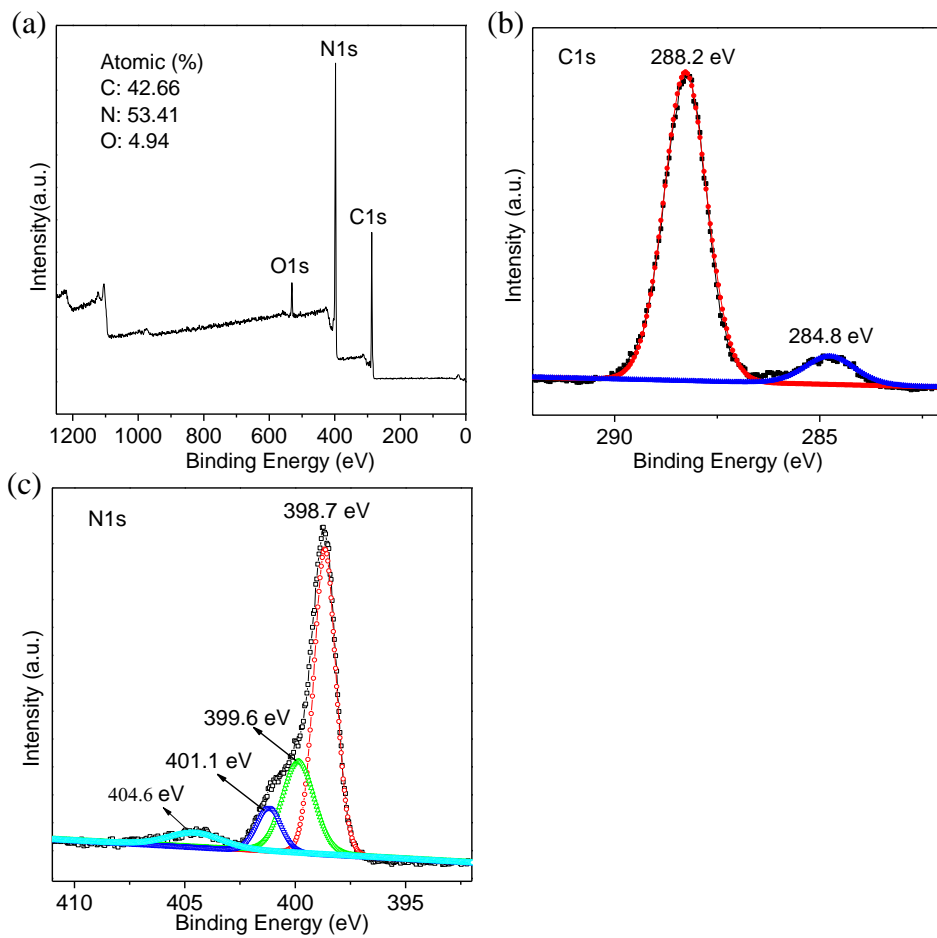

**Fig. S3** (a) XPS survey spectrum of CN-1-2; (b) high resolution C1s spectra and (c) N1s spectra.

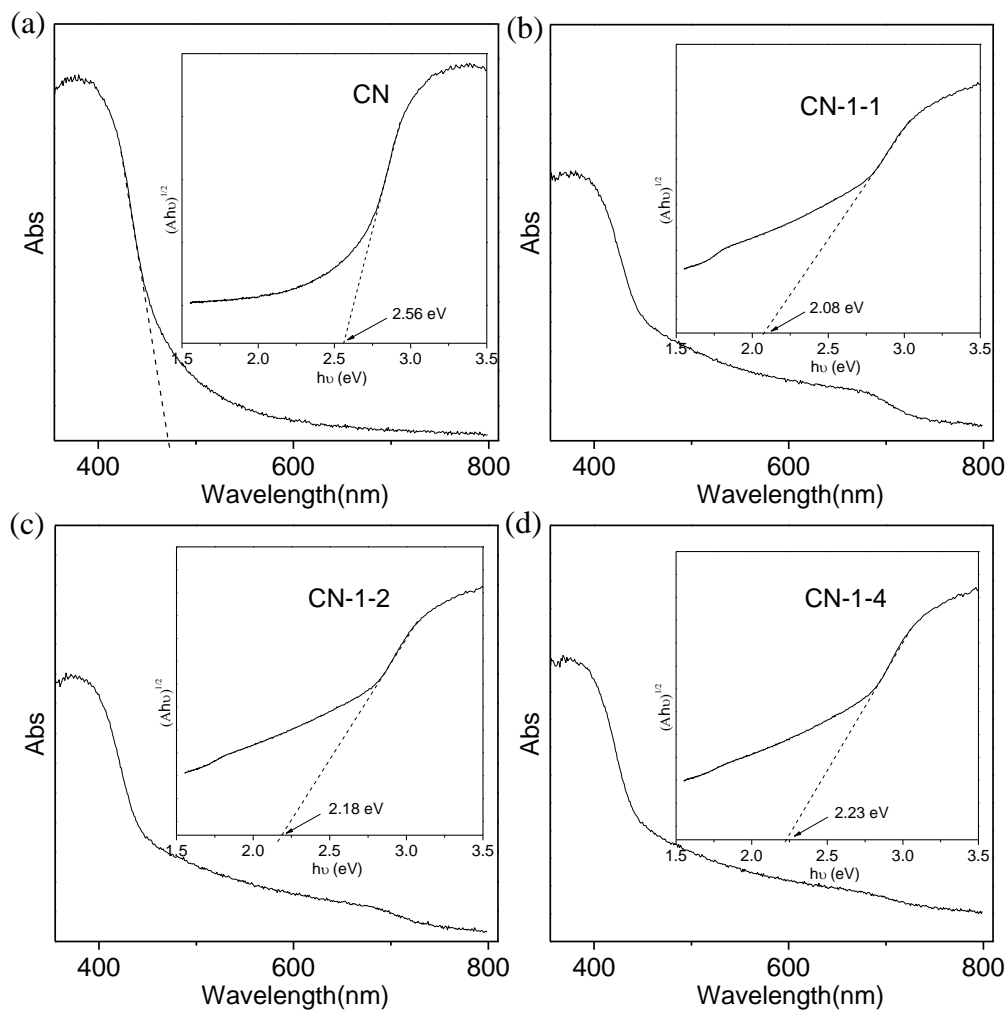

**Fig. S4** The UV-vis spectra and Kubelka-Munk plots for CN and CN-m-n (m/n=1:1, 1:2 and 1:4).

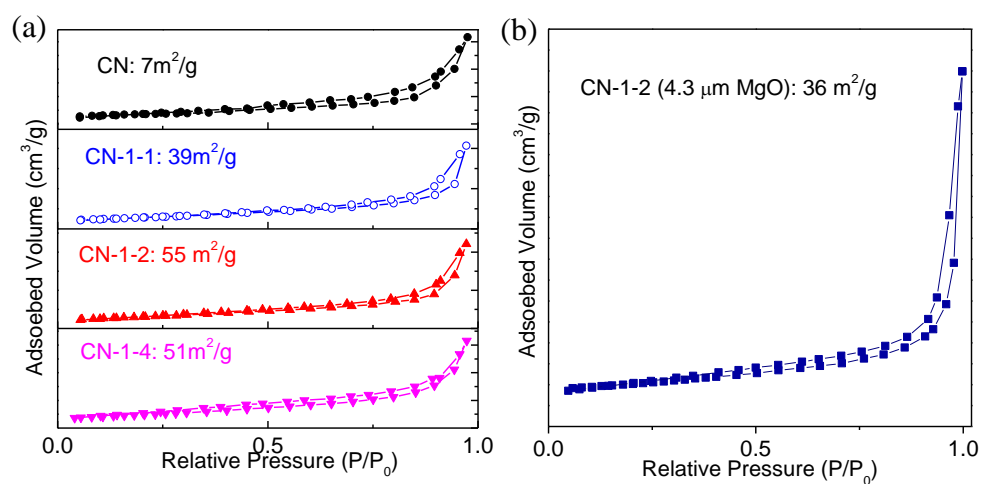

**Fig. S5** The N<sub>2</sub> adsorption-desorption isotherms of (a) CN and CN-m-n (m/n=1:1, 1:2 and 1:4); (b) CN-1-2 (4.3 μm MgO).



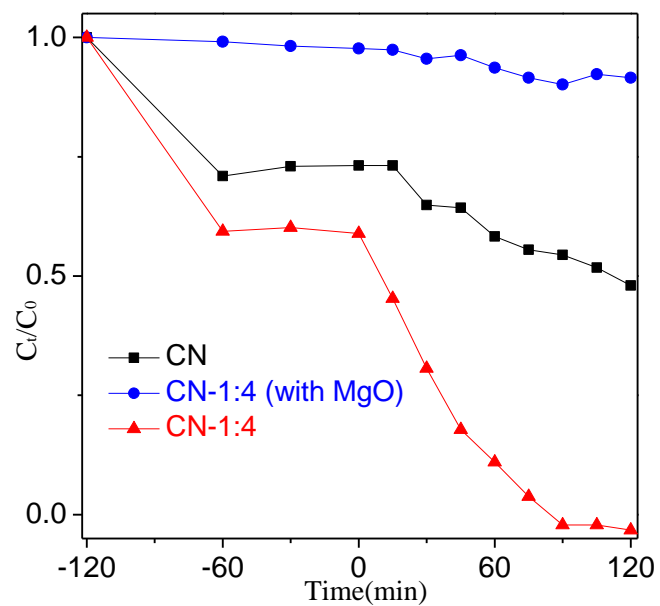

**Fig. S6** The photocatalytic activities of CN, CN-1:2 and CN-1:2 (with MgO) for RhB degradation.

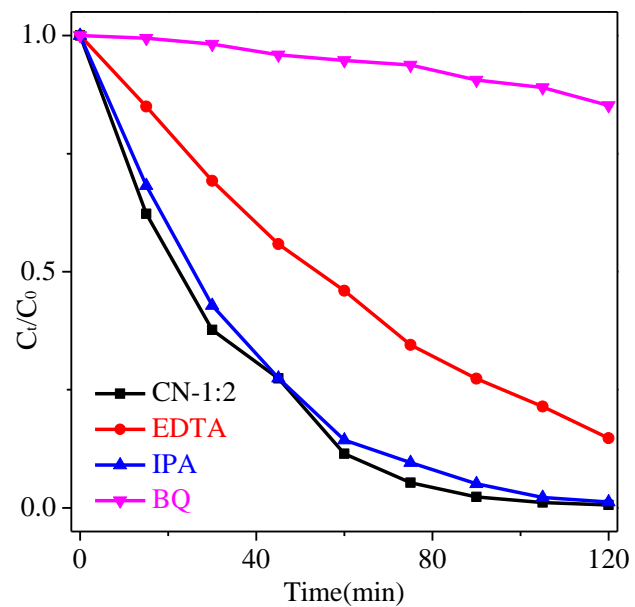

**Fig. S7.** The active species trapping experiments on the degradation of RhB over CN-1:2.

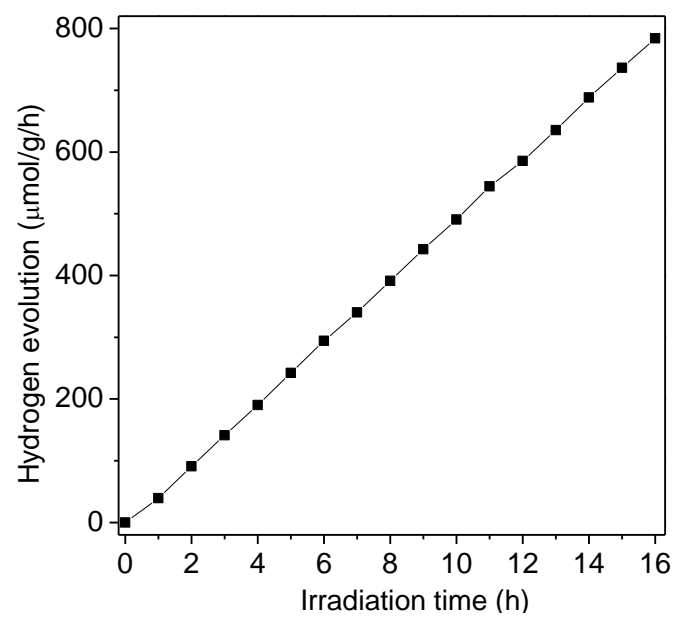

**Fig. S8** The photocatalytic H<sub>2</sub> evolution rate of CN-1-2 for 16 hours under visible light irradiation ( $\lambda \geq 420\text{nm}$ ).

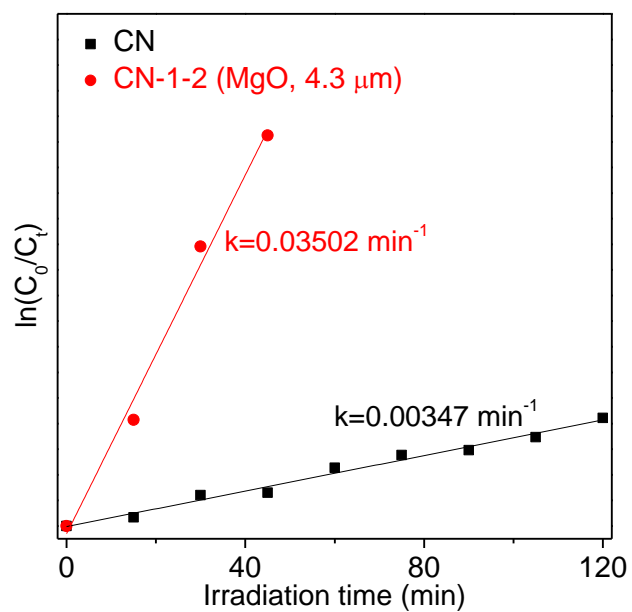

**Fig. S9** Photocatalytic degradation of RhB of CN and CN-1-2 (MgO, 4.3 μm) under visible light conditions ( $\lambda \geq 420\text{nm}$ ).

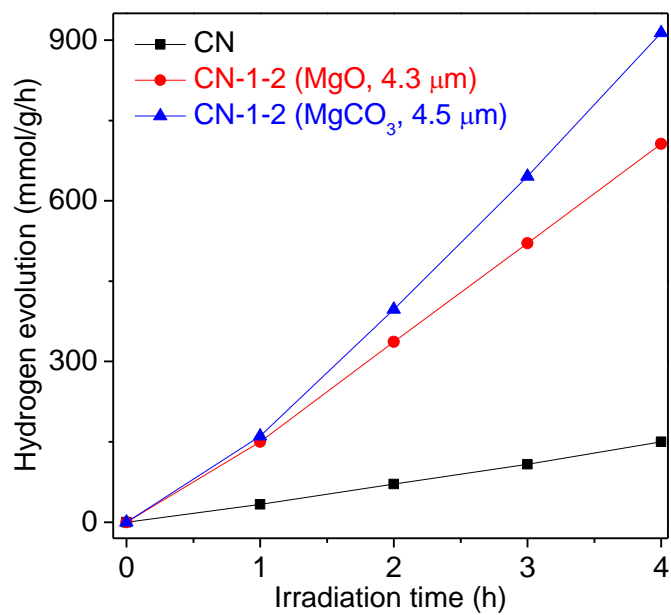

**Fig. S10** Photocatalytic hydrogen evolution rate of CN, CN-1-2 (MgO, 4.3 μm) and CN-1-2 (MgCO<sub>3</sub>, 4.5 μm) under visible light conditions ( $\lambda \geq 420\text{nm}$ ).
